# Supplementary material for: A systemic cell cycle block impacts stage-specific histone modification profiles during Xenopus embryogenesis
Source: PLoS Biol. 2021 Sep 7;19(9):e3001377. doi: 10.1371/journal.pbio.3001377 (PMC8535184; doi:10.1371/journal.pbio.3001377)
Supplement: S2 Data — R10 normalized values used for the absolute heatmap (Fig 4A) are in the Sheet 3 (“normalized”). (XLSX) [file pbio.3001377.s019.xlsx]

## Sheet: endogenous
	M_13_1	M_13_2	M_13_3	M_18_1	M_18_2	M_18_3	M_25_1	M_25_2	M_25_3	M_32_1	M_32_2	M_32_3	H_13_1	H_13_2	H_13_3	H_18_1	H_18_2	H_18_3	H_25_1	H_25_2	H_25_3	H_32_1	H_32_2	H_32_3
H3K4p	25681571840	19268014080	10193885184	6945788416	9392069632	3563324672	36889755648	6549235712	8035281408	4366419968	19797188608	8259653632	11578871808	9867546624	5924638208	2266719232	3406631680	3458380800	14307800064	6477677568	3151429376	1298492416	2040306304	475827584
H3K4m1	2011324544	1529946752	1289925248	814689280	1028630848	393948352	4800897536	1036551360	947888768	641644032	1923935232	981703616	1382145536	1141209600	970134784	365495232	563766400	697735936	2985387776	1289165056	613879040	353870432	572220224	154571328
H3K4m2	36102384	102612384	48472892	29686846	56096000	9162326	117864584	23812104	58608676	19450808	116374008	21039772	34190396	24969752	15899737	14208820	10114334	10906758	49120196	15452037	7972816	18361892	9597581	1286498
H3K4m3	19544898	45110484	22269010	13679067	30670774	3848622	56159100	12087510	30521986	6726179	60436620	9069200	17880148	16557590	9887913	6112203	5170513	5266793	20644570	7191716	3106586	6078714	3900650	980784
H3T3Ph/K4p	0	0	433556	417832	0	99005	0	0	0	93897	0	0	0	432710	95215	210643	153069	243939	0	259964	309171	30647	933498	80377
H3K4p/T6Ph	1141430	1154983	29699164	4697344	20457736	5785251	11661308	1582267	13127244	320322	11570472	6449697	249419	509312	55768788	3632779	8133480	14555700	37749652	24474452	9633725	720182	4782405	3413822
H3K4m1/T6Ph	77386	123243	88290	132402	86358	35131	112206	430787	1873	175459	3238	53281	11473	72216	29624	63247	28559	79510	358431	32351	70849	150504	217632	61843
H3K9p/K14p	12288731136	9681304576	8170629632	4819861504	6986121216	2338877184	29483880448	5222490624	6141903872	3902737920	6554554880	5738011136	4551822848	4009072128	3222440960	902270912	1278811776	1444468608	7726068224	4743534080	1819134848	271459680	824203520	191813456
H3K9m1/K14ac	21707128832	24138586112	16573122560	6684142592	9477600256	2966013952	36573151232	7039204864	7753116672	3395967232	13705891840	5470630400	14221070336	12059997184	8194936320	1747011840	2477883136	2755686144	11200755712	4728491008	2107796992	807562752	1239614208	389474048
H3K9m1/K14p	13438416896	12438483968	9155558400	4338207232	6948016640	2034288000	28982452224	4725934592	5207268352	3079435520	7580557824	4863130624	6667353088	6281869312	4304739840	1108125568	1672021632	1873463552	11755256832	5318670848	1704394112	331139648	1096200832	200513760
H3K9m2/K14p	4615411712	4568388608	3253117184	1929012224	3036357632	1217969280	12383115264	2030602880	2216365824	1454349568	5459617280	1955319680	2951474688	2772687872	2144408576	860575744	1525732224	1439830784	5937959936	2995133184	1354652800	607191296	1245524096	182836416
H3K9m3/K14ac	1217851776	1805805184	1885647744	770022144	1383065600	675162368	3426289408	1284449024	947411776	612088768	3055605248	838234624	1887225216	1944488192	1900618880	615566848	1274562048	1247181056	3349573120	2145997312	1048864128	1130807936	1109629056	219820544
H3K9m3/K14p	1738015104	1778610816	1267487744	736392896	1247486976	509358560	2059284096	889518912	1005129344	609243456	2269737216	855063488	1282165376	1205961216	878604544	428695104	867968000	788497216	3628185344	2096725760	809431680	396555744	838766016	117200528
H3K9ac/K14p	0	0	0	0	0	0	0	0	0	1159576	0	0	0	0	0	0	0	0	2244120	583282	600365	0	196702	0
H3K9p/K14ac	1292049649	73655431	106226285	548780805	2348400	6151897	1481816680	598665786	34101499	146592470	139310542	163566814	2272082	416267891	10729720	1871371	118302117	165886902	416488434	39004839	83419897	89081550	39669106	1647118
H3K9ac/K14ac	750175168	585740800	313859360	229179776	233547904	112533592	1077656576	350594592	262424192	210162208	800252224	189810560	378850496	316142144	218363312	94908608	107116624	130440416	440978016	170209808	133800144	125968320	88486312	30262776
H3K9p/S10Ph/K14p	77471536	111237600	168713312	34411104	111641888	21456422	190482768	49636432	93537360	20554214	75390120	111025536	1990020	3273043	11778806	1139158	4051571	1955597	11861282	10971916	1311029	2030066	1405602	153771
H3K9p/S10Ph/K14ac	98950888	163793712	359987136	62232024	211394736	46120096	278563744	82622576	186052000	28863628	306351040	179727904	3458985	3429461	32433360	3034463	4697882	3915724	9074203	13209927	2801340	1218079	2262671	1113570
H3K18p/K23p	104135696384	129492705280	15474458624	837812096	971015360	31365460	15403415	1297978	1718485248	2009618816	6501999104	4067158272	1196103040	1023232896	1511744640	176062021632	11401360384	1161868032	1096732416	1285967744	9535604736	9355817984	1475946752	1327028992
H3K18ac/K23m1	0	0	0	0	0	0	294878	169300	0	0	0	0	0	0	27369	0	0	0	159813	0	5100	0	31518	0
H3K18ac/K23p	52579807232	30640822272	979533184	840654976	1198946816	1809512704	16878492	1789009536	1887508864	2082927488	6613573632	13774448640	1586555648	1368921600	91678130176	142284636160	9834382336	923534080	963576704	13633119232	10113027072	1571102976	1261570176	1178971264
H3K18p/K23ac	270113964032	15343193088	1012225536	1124219264	1208971264	6496789	267123584	2155434496	1894038144	12324612096	18872459264	2163418624	927977152	1226011264	68673740800	63602278400	5643689472	987720832	1152627712	8248379392	7282393600	1105661696	586526464	1467155328
H3K18ac/K23ac	207994687	19894292106	873615375	554013904	525928483	186226118	99425	751666851	669965875	357606656	0	375976083	923919274	911690988	621420010	172353249	220272773	245343473	1483654342	416609380	208834194	213058082	165346400	56167055
H3K27p/K36p/K37p	49133326336	48242630656	33193218048	12231659520	17862443008	6296841728	58140565504	8041780224	12991286272	4960403456	47739650048	10287357952	12913727488	9963124736	7960522752	999709120	1169605888	1141757824	3689912320	1474757504	566457216	134707472	251044016	114664184
H3K27m1/K36p/K37p	12838623232	14259458048	13325502464	4926650880	9295428608	2968869888	8462646272	3963217664	7696576000	2408762880	16564867072	5547587584	8723722240	5646571520	6288500224	880258048	968670848	1246702976	3404092416	1006916800	609671744	90955136	164538016	85763000
H3K27p/K36m1/K37p	19526594560	19592796160	17426690048	7616814080	10418267136	3507744256	19339669504	4593438720	6245301248	2421086464	12319281152	4830100480	15592915968	11694396416	9212550144	1350089216	1438364672	1605727488	4318983168	989196928	581900864	74712384	166537904	69815968
H3K27p/K37p/K37m1	21848312	22165806	17614496	10706555	10009172	7148603	22267886	9715389	8978281	6525079	16889436	6194728	11218376	14776141	15451383	5969961	8224788	8904347	11801240	11667880	1746213	254743	1363077	295740
H3K27m2/K36p/K37p	0	418745357	507660615	283222278	527020973	159181326	0	593461503	738101650	280614911	0	545238339	331663474	240439945	359912490	109028307	164800829	174011468	476244148	276791524	148016690	40739190	55843173	15823145
H3K27p/K36m2/K37p	21671690240	25719298048	16436745216	6150855680	9949529088	3342499840	29906784256	4607049728	6570788352	2327742720	16561445888	4055826432	16121693184	13070468096	8604691456	2157452032	2685966592	2482361344	8810621952	1730060160	1019688896	221928384	456055904	105921400
H3K27p/K36p/K37m2	0	61957	0	212232	21273	0	0	0	0	0	0	0	0	0	0	0	0	0	52043	0	0	0	0	0
H3K27ac/K36m3/K37p	210110272	354368576	185013728	84658864	176230320	42967896	302063232	150659520	94229952	41429860	172390864	89416864	282145440	223585424	62352824	55031108	70736992	58396668	282493376	95594704	25334456	33279766	36779636	14610620
H3K27m3/K36p/K37p	229341920	273862880	241487200	181236480	290408224	100347104	1227201792	524000640	408482176	248450944	899815616	443396704	253581872	151379248	180134672	117564536	211971536	197541648	1069085184	367416544	265525072	161144208	202139648	62045184
H3K27p/K36m3/K37p	3433335808	4186804224	1787765120	903036800	1470374912	795200640	8217690112	1200446208	1686474496	583225344	4870518272	1208950784	2686116352	1951022208	1269943424	470341632	642824640	626998912	3817482752	572449024	412345184	98537744	277894560	60979544
H3K27p/K36p/K37m3	497720384	806997248	537896704	282932480	553611520	219130432	1850544896	448691520	563273472	216793488	1792009984	433927168	612288832	505555392	475054400	202039808	346906240	353802752	1434398208	677069696	340741440	176438016	214407200	56777284
H3K27m2/K36m1/K37p	3613881344	3939823616	3562090496	2114877696	4211139584	1308686848	24209600512	6044082176	5485060096	2827534080	10646394880	5440789504	3964958208	3101780224	2848096000	1397737088	2242182656	2640811264	15937231872	5334960640	2363506688	1093880192	2129809536	509338560
H3K27m1/K36m2/K37p	8159690752	8832490496	6403113472	3202218240	6221497856	1844554624	29134950400	5751173632	6776646144	2649116672	18366883840	4776774144	7933700096	5759511040	4779073536	1912894848	2575970560	3474443008	21728186368	4318721536	2182380032	903245696	1924613888	379008352
H3K27m1/K36m1/K37p	11311895552	9911745536	7905243136	4201777152	7059518464	2155334144	36829339648	4167336192	6142204928	2155356416	11171885056	4465369088	8956743680	5649163264	5674186752	1273413632	1616005632	2555977728	8630544384	2074808192	1177588992	175299312	462377632	165595328
H3K27m1/K36p/K37m1	2551621	2692044	4282573	1852389	3971014	1920444	7843118	4793905	7996800	1554792	5686754	2636934	4317353	5908993	2509085	3003221	540841	799262	620094	1305973	701483	1431433	1847996	1254114
H3K27ac/K36p/K37p	64663637	59513269	59632271	23016039	32886038	9602389	98395984	18354555	34265918	10271900	78751096	19409917	21246429	14236758	15169036	1770939	2154271	1994256	7377091	3144795	1138753	270470	278615	124689
H3K27p/K36ac/K37p	64134392	102520472	60538624	19162168	21507680	10981796	60685976	23953910	16007890	11011990	67118856	18128128	17498496	19415330	18110852	3473972	4587041	3080101	21734454	11384389	3367567	929245	3173594	463359
H3K27p/K36p/K37ac	1565923	1999203	1018497	404954	81687	38985	324654	330064	60541	76343	301031	89581	75747	51163	31817	0	0	1571	0	0	0	0	0	0
H3K27m2/K36ac/K37p	35368560	35674396	36112012	16086448	16120770	12438894	47194392	31982584	15204476	12674375	100922512	21194928	17654124	16014588	19206628	8065869	9170651	3932615	28569864	16338981	5688153	8657113	6240780	437307
H3K27ac/K36m2/K37p	922984896	1384543232	705796224	375282720	357682976	181274384	1001433600	339660192	204328080	129282456	930908736	181586784	763172352	571207232	437665632	109390184	108058336	92563496	319085856	89944376	50995836	28079160	23979556	8188306
H3K27ac/K36ac/K37p	0	28095	85504	0	0	0	31806	0	0	0	0	0	66793	0	0	0	0	0	130445	0	0	0	0	0
H33K27p/K36p/K37p	4969182208	5015716352	3047788800	1108259456	1817943424	727545024	5847579136	733144256	1295125248	492334560	4832798720	1054337472	2666232832	2240442880	1641337344	337566272	489927264	490706240	2382195712	784842560	278753952	101332304	188279488	66119852
H3un	63563022336	78139572224	63889141760	32761845760	51722653696	21502035968	94261182464	36647682048	43690307584	22312194048	177252319232	39115550720	52782665728	40831176704	45862825984	13827598336	18244747264	16178837504	73595035648	19130621952	18455476224	17494697984	14779577344	2923462912
H3K56p	22808596480	42551762944	35794472960	21609601024	33620283392	16515330048	95995781120	21468682240	28845086720	14639233024	89684721664	27407583232	24083124224	24857352192	29512761344	10976138240	11737926656	13809956864	43136462848	14533133312	14560534528	8993753088	11287241728	2857824256
H3K56m1/S57Ph	205356	539375	2885196	4850884	2520906	1878936	888033	7999539	1401613	5454482	1123861	1606363	2048461	1954488	2416977	3101920	1926259	1956553	1131943	1993815	2561136	3599279	3879851	2557351
H3K56m2	3023045	546812	5625230	710845	1787459	583183	106937	1354433	1437114	1329452	4757498	2611744	1587152	349611	2331745	568299	143639	537176	1475140	586199	1014248	3222777	451700	309593
H3K56m3	579029	2527053	7786909	44842	113678	14970	228654	49308	44740	5970	153380	15706	3011739	57839	4013	23282	17169	9361	7307115	140011	65358	5513	26651	30707
H3K56ac	134915	289249	678207	118093	646966	127068	1200252	177759	458560	269988	3037608	298806	332680	459264	450550	108744	318172	180079	2291281	340599	138653	41632	100747	28394
H3K56ac/S57Ph	49234184	124520136	99670912	55038312	37042432	37318616	90548000	63505408	31521292	45539668	197659312	51312844	19756228	37743452	64306412	30271266	29880644	11548788	48270340	58131084	28462716	12370780	45950080	2642556
H3K64p	134698532864	129442471936	106272653312	54998978560	75878031360	29449467904	236247564288	52715307008	61653356544	38043480064	223273730048	55034200064	91528642560	67990130688	60308602880	18282907648	23137327104	24926748672	120501993472	44324638720	24900997120	18858270720	18341427200	3707868160
H3K79p	78914666496	84210507776	64901148672	36017049600	50910674944	21209055232	187827601408	27115978752	39240433664	23642914816	149155840000	36262350848	53399629824	36676620288	41188732928	14515566592	14839560192	16901528576	77009666048	18875140096	16395165696	13092682752	13624870912	3002645760
H3K79m1	1237574400	1182191744	1150469120	965286016	1643682304	636013632	9877283840	1937443584	1639940096	1696545792	4081227776	2304462336	1092923136	730491072	941923456	533430016	537974464	727782144	5320702976	1039888768	829581184	819595200	1080697856	186945552
H3K79m2	28764644	38296652	30811906	26764858	46343556	18510948	403480832	175962576	72284792	83412056	379379712	137323696	37639084	29552992	30860014	19143490	25331074	26184154	272621632	57281312	42399144	61895224	60689156	12867572
H3K79m3	702223	220278	129922	323175	13490	924202	1577315	48353	80371	471914	545427	34118	139829	217934	9073229	1334672	804680	419158	491809	375356	694677	2532071	1675406	1355017
H3K122p	76996911104	76279390208	37050425344	17848424448	27401148416	9117566976	171954454528	9764121600	14118233088	11300458496	109976625152	18602098688	37555232768	16766196736	12096265216	7391062528	6627328000	6595566080	60472692736	6476109312	3862032896	4828987904	5577437696	938432512
H4K20p	10554373120	8169860608	6966413312	4828183552	5506650624	1850824192	12345223168	4816536576	5637527552	3308397056	9442686976	4265663488	4582720512	4210228480	4299845120	1599258240	706432768	1022531264	2851835136	2393697792	1036104960	560199104	535722624	418961984
H4K20m1	8351075328	7860112896	7779401728	7764144640	4524253696	1693414784	20295876608	4654810112	3253953792	4196831744	7952527872	2913987840	3881707008	5345551872	4661268992	1587128704	529501504	673553472	1901430528	1238833280	584450688	330698368	422071040	219497456
H4K20m2	19794612224	19006294016	16640678912	14212685824	17937211392	6228904960	50364329984	26214426624	15306088448	19292747776	40548708352	14357387264	17567670272	16354856960	17998635008	9671330816	4288858368	6607435264	22617055232	13522913280	7349647872	7829546496	7551184384	3498065920
H4K20m3	112146912	91175736	73503024	75833904	107804632	38874856	341776960	246772464	80576808	180364816	342359520	100368552	127241112	117884760	99401936	91924336	45390632	78289992	391782400	209965776	77074584	164404176	150734416	63501588
H4un	32891215872	19975102464	22269188096	18363850752	24875511808	10053564416	68615081984	20771536896	25624133632	20029712384	92304539648	23002386432	21374636032	16551120896	33144094720	11676794880	4464806912	8001704448	24179890176	6052292608	9557587968	10241459200	8001354752	4422853632
H4K79p/K91p	1215885568	1933696128	1693888128	1805520768	2771822336	1110688512	7949938176	792608896	1855353600	1341731712	9091665920	2496026880	1662791424	1544568704	3260929536	2582789888	734868544	1227044736	5729713664	578814272	897560448	490131456	968907008	534277824

## Sheet: spike-in (R10)
	M_13_1	M_13_2	M_13_3	M_18_1	M_18_2	M_18_3	M_25_1	M_25_2	M_25_3	M_32_1	M_32_2	M_32_3	H_13_1	H_13_2	H_13_3	H_18_1	H_18_2	H_18_3	H_25_1	H_25_2	H_25_3	H_32_1	H_32_2	H_32_3
H3K4p_R10	225226400	172772576	138259888	256601808	196796256	193421696	114196656	188223760	165954000	225596976	101247952	208144912	193603328	175776016	163274240	270959424	217075568	202993920	180714416	172913632	254026976	201010832	238114016	274191872
H3K4m1_R10	192097328	164630448	175906928	344209376	208821664	240355952	153076512	215528688	156787408	303945728	130697200	206468272	220214640	187949888	223325488	378861120	256549040	248868272	219501824	241518320	321622336	305086720	361006080	366020032
H3K4m2_R10	23011012	63715132	39151676	66097200	65554440	29848854	23847630	31558914	57388272	63041644	29053176	29466458	34423208	23360788	24858350	78156128	29473462	28802468	31582252	24467682	29096600	63307160	54262720	25483016
H3K4m3_R10	32824828	82514152	53057184	88591880	96663088	43632920	42397772	51830420	79847872	84572568	53203792	41008088	48734880	47196576	40741888	105418664	47698520	40030272	46773144	42809152	36113448	85844976	79467424	41995924
H3T3Ph/K4p_R10	53726364	43203652	66009416	161755760	83751544	137493504	23009704	91200480	64856408	137971824	18261230	82022288	74529376	74233280	118168616	197177024	165571408	148752896	58861480	96916296	198328240	145742368	199302592	220124144
H3K4p/T6Ph_R10	29638812	31833674	45023220	106409624	53461500	90835632	27689294	59340500	39310864	87901736	14977884	35622652	44883100	57228820	104290272	165675872	89161032	129335272	46796676	66914132	190550624	98506472	140321840	181755968
H3K4m1/T6Ph_R10	83726776	108205992	153858832	273222816	162191712	218685824	41331600	179907024	96742816	248001968	58449788	130065712	185713216	163471488	237147216	319150432	247447504	225773872	151191792	187660976	287288768	229006128	270244160	305543392
H3K9p/K14p_R10	644557696	619892288	729076928	949980288	847280192	726267072	462017664	831054080	654219136	881302592	246781360	684521856	831298240	755284800	861879488	950939136	754372608	760060736	749529344	807450816	963864896	737751872	973166272	928872896
H3K9m1/K14ac_R10	956409920	1106796032	1040043264	1330420736	1161254784	1072171456	681984768	1123731712	937336448	1267326208	621033408	951925568	1181445120	1090685440	1110857472	1363714304	1153635712	1034235712	1152100352	1136476928	1336179456	988456320	1356341632	1253169024
H3K9m1/K14p_R10	1274477568	1437294592	1462690432	1722254720	1634244224	1311343104	877013632	1589967616	1231589376	1600709888	768028736	1323427968	1571918464	1541968512	1511513216	1780419200	1410222592	1274313216	1528575616	1549802368	1599955456	1282884224	1740004480	1545184768
H3K9m2/K14p_R10	86860960	95438080	86784840	127925336	106616176	109602584	76416080	98577096	83271952	107582336	56721984	84154512	99204304	94352480	103573328	139899712	125482960	110847400	98309112	101675960	137740784	112190144	151295440	178777504
H3K9m3/K14ac_R10	267450880	368201984	461240896	593685952	533423936	669040384	199759360	512166944	317902144	574750784	212041984	414699008	451866368	460715520	662914112	707453824	696633856	615167232	385701120	516308928	732161984	516240736	806903296	785499712
H3K9m3/K14p_R10	226635984	254427248	248308144	365310400	313952736	315809184	75562512	273038784	243523936	307356352	128258496	245777440	266384848	249356048	303871360	400754912	358809792	317134752	236050224	265022192	366640704	287151712	416263296	473120192
H3K9ac/K14p_R10	15810196	1668909	2936481	52177944	964539840	727558	16163592	43121266	1257678	31437034	630313	8345120	53159	41640398	735071	773431	29712499	48489542	55156876	8116508	31627652	72449154	30445977	2903591
H3K9p/K14ac_R10	44492054	6598038	9353742	54108979	749125	2434030	21077001	76586558	4582719	24528868	5953209	21665195	417457	52638220	3072695	1856691	71620202	60417188	59421518	4996930	30404244	93568917	29698076	6938356
H3K9ac/K14ac_R10	449449184	322697312	284775424	590854528	353438176	497322976	228076208	381513184	233359760	623129536	216526896	314855904	411844384	362670560	387503200	758891904	500671840	499358464	430439200	438615520	652278400	598109632	752981504	716994688
H3K9p/S10Ph/K14p_R10	571888896	620418048	647231104	817245440	777622912	628057280	306572064	768993152	591297536	774069312	186211520	606071424	688217344	709934592	771168832	833197632	671403264	615395520	743260096	584738496	804595712	656574144	820579520	714350464
H3K9p/S10Ph/K14ac_R10	447080192	489349216	592078976	794207168	712240512	626923200	380899424	655017088	612725376	709204736	318785376	590023744	589729024	567412800	732104384	862988224	677299648	615037440	569051520	548921152	783963200	635697536	801283456	695497024
H3K18p/K23p_R10	102145007616	40543485952	5537140224	1183868160	882898496	11934026	7830122	1151244	1867744512	1964380416	1908245632	1222519296	1297244800	1257699584	1261788288	27515725824	13158095872	1287872000	983360256	1189266816	2922837504	4353086976	1141521024	1587928960
H3K18ac/K23m1_R10	172149852	172030293	218534585	312714826	265241416	142343312	165362136	253541784	220209559	263404309	138071012	185387905	221843984	189533898	224352192	291379805	212367618	202202017	216671204	242585379	227055056	215655172	273653720	213758362
H3K18ac/K23p_R10	17051625472	9633061888	1077235456	895006336	976314368	15996411	19524266	2382348032	1682405888	1839799680	3008279808	5039616512	1241147648	1533827456	104023982080	26059044864	5236944896	1156492928	902629568	4805893632	8776674304	542611904	1295952512	1345162368
H3K18p/K23ac_R10	39337308160	14814323712	1314568832	1002451776	1171993728	3632402	56400820	1340152192	2286347264	13049548800	5033629696	1165968128	1476170368	1096098176	27067168768	52832792576	1818122240	1155148544	1097981952	2200608256	1725758976	1255990144	1198585088	1093303808
H3K18ac/K23ac_R10	21570187	1882445144	100836188	189033163	106568581	111109960	0	145742861	103893579	163130695	0	97598282	133363937	130664549	131879757	179242217	131422931	108762746	204657802	148890738	155860504	135739310	183520205	141652304
H3K27p/K36p/K37p_R10	1390021120	1434121728	1212165888	1415917824	1300172288	1145193216	1186195456	1288962944	1162963328	1231371264	1188834944	1078674176	1488464640	1318132352	1231595136	1530557312	1197159424	1107330048	1697612288	1264920960	1155138432	1151867776	1485835264	1385879424
H3K27m1/K36p/K37p_R10	443493984	461068096	428435424	562405952	491830624	474408256	141995728	496254720	452375488	493731872	313857184	453299424	535840672	429383648	503063744	678862528	398680064	438274400	595221632	429625024	449416128	481933408	620880128	595098240
H3K27p/K36m1/K37p_R10	255155696	273964672	280089120	519754432	452772448	436367744	191024112	528649920	363560672	442538144	328740448	419517632	461475456	387267488	420492480	603778560	421772480	415330112	582334848	408734208	434872256	456362528	552647616	568589888
H3K27p/K37p/K37m1_R10	702623552	645411264	619662848	771408576	702064448	652160576	602214400	658732416	607907776	594733824	640302464	543583360	847098624	653924352	703005632	913100224	599176704	597844544	906846592	566110400	571159360	651395520	804866560	769807744
H3K27m2/K36p/K37p_R10	0	27780646	30111392	32286057	33854918	22955942	0	28090877	25788257	25916155	0	21313416	31565216	25241029	31946564	35569637	26334481	24367219	26019503	20058893	22647160	21593538	34622036	25006831
H3K27p/K36m2/K37p_R10	185494592	206258848	198410432	223754912	228086384	192004848	288571168	244411712	198112096	180646976	218403760	194016688	197562656	182658432	185688544	229714512	206561344	172550400	232526144	166071712	160232416	172640160	261219264	235877472
H3K27p/K36p/K37m2_R10	0	12467325	12620798	16727349	15172296	8869605	0	12289536	11432609	11355413	0	11199342	14759808	10919127	12499519	15388483	11784777	10389241	2290959	8474943	8709487	10468448	17265776	10696113
H3K27ac/K36m3/K37p_R10	1098903552	1414594944	1379976832	1425943424	1648160128	1304904960	786752704	1418976256	1174498432	1124310656	775802624	1131437568	1451027968	1205283968	974913984	1717295360	1244239744	1119400704	1479064192	1021878592	969252096	1113278976	1736564352	1420022400
H3K27m3/K36p/K37p_R10	196803232	222374848	210993088	233870464	195562048	150924640	100235224	192667680	159463712	156022768	90022184	153580288	237730464	157246464	221575040	236375296	197358048	182340896	216377552	102861600	164412864	165351968	247494256	230831936
H3K27p/K36m3/K37p_R10	240297344	311389600	309345888	329171200	318523968	299021696	206896400	357209568	313170816	247915296	222330592	292866944	312056480	261200736	311143552	335835264	300587936	267337888	336839776	208436880	243960704	268809984	421088768	370226688
H3K27p/K36p/K37m3_R10	467822784	563796544	476624864	551406912	533606944	441914464	349879680	483567232	414121984	376292032	324823456	389460288	552630912	453538496	511438592	551703296	444073152	421717184	547131968	316358656	372831552	403024128	585269504	504211008
H3K27m2/K36m1/K37p_R10	337224992	387369344	366162688	398156544	396209504	309791360	255798080	340277568	315851936	271625024	229573968	301542560	397985248	347300320	383635072	450515776	284526784	284598016	360806784	237568976	249070880	262285440	380647520	340919328
H3K27m1/K36m2/K37p_R10	749315648	798205440	713744704	791523904	784130688	621224064	596327872	736017984	683010880	544104192	713093696	600713728	825784832	620929280	720999744	793478720	549835776	552939904	847967680	466636448	518932448	559399872	802601472	712787328
H3K27m1/K36m1/K37p_R10	1448802304	1410134784	1461694720	1987020928	1669070080	1464782208	1236203264	1576573184	1407419648	1373013120	1427121152	1328741888	1701881088	1196153088	1602508032	1969252992	1179748864	1334605696	1738372352	1262382208	1278297088	1413920000	1763138304	1593214336
H3K27m1/K36p/K37m1_R10	474000416	456720480	400281568	562544320	483764736	340636064	469186784	376636576	386859520	323436480	382327136	348557472	560560512	376520704	364424672	533869376	327721952	345035744	468257408	286055328	326247584	343156160	428136000	468491200
H3K27ac/K36p/K37p_R10	12236318	9040626	8455099	291408245	9271462	6828644	9206571	10133221	8382823	11293748	6399889	7798043	12144201	8529082	7528295	9023397	6860673	6536918	11522517	9364766	6493964	8216567	9697856	6846258
H3K27p/K36ac/K37p_R10	1664395008	1781404800	1426675072	1642736256	1807233408	1305025792	1509721856	1708734080	1462965888	1557160832	1452901888	1436710272	1824748288	1551706112	1478568704	1593934336	1158462464	1099632384	1787089408	1312562944	1174497024	1195529984	1473815168	1358856192
H3K27p/K36p/K37ac_R10	108480013	52294470	90840452	117047779	99600293	73402247	81671394	99538302	84139416	106044305	69712584	75462954	113584547	92320497	85112303	107322178	76040364	72931185	101232784	93531007	72123656	83308357	100244814	81803422
H3K27m2/K36ac/K37p_R10	1178751488	1382393344	1444697984	1692448256	1559182848	1332488320	872236096	1350270976	1339499776	1114851328	654860608	1271738624	1409124352	1201052928	1555381504	1671354240	1182536448	1232735104	1515301504	987662656	1072239936	1123229440	1592546688	1492826496
H3K27ac/K36m2/K37p_R10	329819488	457010944	287773120	489878400	310267648	390491808	261083040	429523968	151280160	323573824	221855200	260259840	433166912	335496992	313756096	469836448	355560480	264349664	432068864	327382080	275996928	338562944	540327104	402813664
H3K27ac/K36ac/K37p_R10	33063828	25850366	31120851	41050856	31301023	25883883	17820374	30362506	30481126	38583727	23369019	22234510	36789695	28409841	27958060	39951453	24957168	23367472	30709761	26855997	24561591	28126869	32047665	27742142
H33K27p/K36p/K37p_R10	1112248192	1029343744	931477504	1095479680	1039676928	928279552	916710400	1043880576	945772992	1049014912	944450432	868936320	1161658624	990614784	1005901888	1176723072	913867520	837836800	1231883264	886210112	818973568	935646208	1089145344	1038438080
H3un_R10	530948832	671878976	648210496	805118080	857664064	718962176	331219648	796944192	697823616	597148992	419488384	623377856	738877888	651145984	784457536	930701376	739194112	597515584	739631808	492343136	844651200	598227776	914067200	819150784
H3K56p_R10	21425632	26398386	24814100	49964376	43399432	45185220	8166931	42266984	26511240	41300532	10563073	27010670	36864524	28703608	38426612	58766608	41974652	48805208	29798088	30128734	58650220	38029004	54237012	80149264
H3K56m1/S57Ph_R10	255936960	333792256	428918016	676903744	532174976	503032576	371093024	562879168	400149984	575653312	352608096	363907904	572705856	493446112	492801344	693615808	461951648	489214176	467042944	451127680	662223872	510560640	590432704	630897728
H3K56m2_R10	177418848	216623216	251767472	422814208	325451200	322940576	242841232	352297728	225713760	362287424	233845728	215921216	340655456	291800256	296153152	435622080	301920832	313733472	308888160	288296128	444059456	304890592	390051776	450733408
H3K56m3_R10	61866352	77453888	75092744	104168336	99240544	87507200	78501472	84354392	52935924	94991848	64864676	52395056	66483460	53138172	81156640	137843360	73161912	97638872	76639296	56002228	111667152	78481352	98693840	144720528
H3K56ac_R10	64044208	18976060	54898976	25678432	43866300	27126004	115311296	20066314	56768872	25016140	138799408	38029908	16215756	15948175	58700784	30203344	20937514	22367132	50490296	17858974	23491756	31383950	28062076	37733564
H3K56ac/S57Ph_R10	166437504	216950768	224919808	349910400	305877216	339551840	232979072	298361376	214513664	304089504	255912224	191553872	272470272	239028736	280967680	376486400	310894976	347596960	246575264	237084400	433406784	245484096	381852768	473076192
H3K64p_R10	1238860672	1380000640	1325069824	1762621696	1470099456	1301248384	926071104	1635745024	1199527936	1383298048	1017623168	1073824512	1450045056	1331260416	1268464640	1867351552	1267141632	1040998656	1514468352	1560162432	1448123904	1371129216	1590840192	1273116416
H3K79p_R10	127831544	119089152	98345144	142518176	140735008	136235472	80763808	70705344	79760168	141597440	148780416	89899336	142437360	66159596	142529920	120173832	87522120	186931680	88517304	81064656	124298448	117097184	138185920	167066064
H3K79m1_R10	127775376	70430568	89919224	137222608	133372176	119982280	87572464	45620928	55333448	129936448	108983096	63362400	152289328	46426704	146682720	85016408	62217260	182003712	69560320	62339736	105143104	88404864	113923400	142746272
H3K79m2_R10	46964756	61602400	55779444	61681000	69621472	73158048	36063268	56041832	45090456	47338932	56940712	48546048	56025220	50168580	59856824	70809424	54900608	64864700	56837888	46784768	53609672	48191712	78968720	54002340
H3K79m3_R10	388207936	573922752	726519936	554142080	877308032	704780672	238932336	699035904	905821696	591795008	337606272	880872576	573066432	519836672	678584832	583800064	389586912	339592768	342462528	439424832	336022688	556894400	585093824	321680608
H3K122p_R10	18391186	15664861	18080920	21436228	17841070	24506260	9557911	19109022	11051089	19462718	11016691	15154746	20723420	16334920	14998593	40278848	21096182	14122149	18370592	20182348	14200593	24561438	26051454	24860898
H4K20p_R10	721144256	794004032	794426432	999997760	930167552	796086336	604041728	940135232	716145024	1029140672	507798912	739750336	920837120	822721216	860073472	1132737408	897544832	810824000	841976896	1004871296	1033371648	973194240	1010204288	990977664
H4K20m1_R10	551999936	736597120	882164160	1614908160	931622720	1030361088	1031177088	1148905984	562924992	1512419456	919607424	756717376	997534144	1149535488	1250227712	1695268480	1130087808	1014808832	939944064	1393265152	1400497920	1381563008	1288293632	1133953024
H4K20m2_R10	406531008	497733504	435857760	760933760	634671808	589911744	336948896	625702336	375607168	731855744	272999072	425108992	657270784	563684864	554791808	777952512	599073024	550010176	579745728	641062208	700937664	628652544	765791936	605812736
H4K20m3_R10	522125600	513324832	494633120	778672960	677812672	599803712	298427328	694177984	400802240	806186752	321518336	431796288	718964736	631157376	599559040	842734784	639250176	590620864	597467200	777400256	714354240	703265792	832074944	585346048
H4un_R10	392783296	463698624	468707520	553060160	586109376	549914176	341952288	590317376	398193792	455275264	458113952	380936544	464474144	516583584	488561440	737908224	548465472	477814688	570013312	556135232	553477184	538272640	649620096	556200512
H4K79p/K91p_R10	1163603	3857913	2658842	2963151	4521280	3717317	1622930	937658	1508722	2134644	9860615	1889596	3338288	957676	4574658	5162946	3137025	7185123	3699503	2589074	3669312	2109598	4641660	6228423

## Sheet: normalized
	M_13_1	M_13_2	M_13_3	M_18_1	M_18_2	M_18_3	M_25_1	M_25_2	M_25_3	M_32_1	M_32_2	M_32_3	H_13_1	H_13_2	H_13_3	H_18_1	H_18_2	H_18_3	H_25_1	H_25_2	H_25_3	H_32_1	H_32_2	H_32_3
H3K4p	114.026	111.522	73.7299	27.0684	47.7248	18.4226	323.037	34.7949	48.4187	19.355	195.532	39.6822	59.8072	56.137	36.2864	8.36553	15.6933	17.0369	79.1735	37.4619	12.4059	6.45981	8.56861	1.73538
H3K4m1	10.4703	9.29322	7.333	2.36684	4.92588	1.63902	31.3627	4.80934	6.04569	2.11105	14.7206	4.75474	6.27636	6.07188	4.34404	0.964721	2.1975	2.80364	13.6007	5.33775	1.9087	1.1599	1.58507	0.422303
H3K4m2	1.56892	1.61049	1.23808	0.449139	0.855716	0.306957	4.9424	0.754529	1.02127	0.308539	4.00555	0.714024	0.993237	1.06887	0.639614	0.1818	0.343167	0.378674	1.55531	0.631528	0.274012	0.290044	0.176872	0.0504845
H3K4m3	0.59543	0.5467	0.419717	0.154405	0.317296	0.0882045	1.32458	0.233213	0.382252	0.0795315	1.13595	0.221156	0.366886	0.350822	0.242696	0.0579803	0.1084	0.13157	0.441377	0.167995	0.086023	0.0708104	0.0490849	0.0233543
H3T3Ph/K4p	0	0	0.00656809	0.0025831	0	0.00072007	0	0	0	0.000680552	0	0	0	0.00582906	0.000805755	0.00106829	0.000924489	0.00163989	0	0.00268236	0.00155889	0.000210282	0.00468382	0.000365144
H3K4p/T6Ph	0.0385113	0.0362818	0.659641	0.044144	0.382663	0.0636892	0.421149	0.0266642	0.333934	0.00364409	0.772504	0.181056	0.00555708	0.00889957	0.534746	0.021927	0.0912224	0.112542	0.806674	0.365759	0.0505573	0.00731101	0.0340817	0.0187824
H3K4m1/T6Ph	0.000924268	0.00113897	0.000573838	0.000484593	0.000532444	0.000160646	0.00271478	0.0023945	1.93606e-05	0.00070749	5.5398e-05	0.000409647	6.1778e-05	0.000441765	0.000124918	0.000198173	0.000115414	0.000352167	0.0023707	0.000172391	0.000246612	0.000657205	0.000805316	0.000202403
H3K9p/K14p	19.0654	15.6177	11.2068	5.07364	8.24535	3.22041	63.8155	6.28418	9.38814	4.42837	26.5602	8.38251	5.47556	5.30803	3.73885	0.948821	1.6952	1.90046	10.3079	5.8747	1.88733	0.367955	0.84693	0.206501
H3K9m1/K14ac	22.6965	21.8094	15.935	5.02408	8.16152	2.76636	53.6275	6.26413	8.27143	2.67963	22.0695	5.74691	12.037	11.0573	7.37713	1.28107	2.14789	2.66447	9.72203	4.16066	1.57748	0.816994	0.91394	0.310791
H3K9m1/K14p	10.5443	8.6541	6.2594	2.51891	4.25152	1.5513	33.0468	2.97235	4.22809	1.92379	9.87015	3.67465	4.24154	4.07393	2.84797	0.622396	1.18564	1.47018	7.69033	3.43184	1.06528	0.258121	0.629999	0.129767
H3K9m2/K14p	53.1356	47.8676	37.4849	15.0792	28.4793	11.1126	162.049	20.5991	26.616	13.5185	96.2522	23.2349	29.7515	29.3865	20.7043	6.15138	12.1589	12.9893	60.4009	29.4576	9.8348	5.41216	8.2324	1.0227
H3K9m3/K14ac	4.55355	4.90439	4.08821	1.29702	2.59281	1.00915	17.1521	2.50787	2.9802	1.06496	14.4104	2.02131	4.17651	4.22058	2.86707	0.870116	1.8296	2.02739	8.68437	4.15642	1.43256	2.19047	1.37517	0.279848
H3K9m3/K14p	7.66875	6.99065	5.1045	2.0158	3.97349	1.61287	27.2527	3.25785	4.12744	1.98221	17.6966	3.47902	4.81321	4.8363	2.89137	1.06972	2.41902	2.48632	15.3704	7.91151	2.2077	1.381	2.01499	0.247718
H3K9ac/K14p	0	0	0	0	0	0	0	0	0	0.0368857	0	0	0	0	0	0	0	0	0.0406861	0.0718637	0.0189823	0	0.00646069	0
H3K9p/K14ac	29.04	11.1632	11.3566	10.1421	3.13486	2.52745	70.3049	7.81685	7.44132	5.97632	23.4009	7.54975	5.44267	7.90809	3.49196	1.00791	1.6518	2.74569	7.00905	7.80576	2.74369	0.952042	1.33575	0.237393
H3K9ac/K14ac	1.6691	1.81514	1.10213	0.387879	0.660789	0.226279	4.72498	0.918958	1.12455	0.337269	3.69586	0.602849	0.919887	0.871706	0.563514	0.125062	0.213946	0.261216	1.02448	0.388062	0.205127	0.210611	0.117515	0.0422078
H3K9p/S10Ph/K14p	0.135466	0.179295	0.260669	0.0421062	0.143568	0.0341632	0.621331	0.0645473	0.15819	0.0265535	0.404863	0.183189	0.00289156	0.00461034	0.015274	0.00136721	0.00603448	0.00317779	0.0159585	0.0187638	0.00162943	0.00309191	0.00171294	0.00021526
H3K9p/S10Ph/K14ac	0.221327	0.334717	0.608005	0.0783574	0.296802	0.0735658	0.731331	0.126138	0.303647	0.0406986	0.960995	0.304611	0.00586538	0.00604403	0.0443016	0.00351623	0.00693619	0.00636664	0.0159462	0.0240653	0.00357331	0.00191613	0.00282381	0.00160111
H3K18p/K23p	1.01949	3.19392	2.79467	0.70769	1.0998	2.62824	1.9672	1.12746	0.920086	1.02303	3.40732	3.32687	0.922033	0.813575	1.1981	6.3986	0.86649	0.902161	1.11529	1.08131	3.26245	2.14924	1.29297	0.835698
H3K18ac/K23m1	0	0	0	0	0	0	0.00178323	0.00066774	0	0	0	0	0	0	0.000121991	0	0	0	0.000737583	0	2.24615e-05	0	0.000115175	0
H3K18ac/K23p	3.08357	3.1808	0.909303	0.939273	1.22803	113.12	0.864488	0.750944	1.12191	1.13215	2.19846	2.73323	1.2783	0.892487	0.881317	5.46009	1.87789	0.798564	1.06752	2.83675	1.15226	2.89545	0.973469	0.876453
H3K18p/K23ac	6.86661	1.0357	0.770006	1.12147	1.03155	1.78857	4.73616	1.60835	0.828412	0.944447	3.74927	1.85547	0.628638	1.11852	2.53716	1.20384	3.10413	0.85506	1.04977	3.74823	4.21982	0.880311	0.489349	1.34195
H3K18ac/K23ac	9.64269	10.5683	8.66371	2.93078	4.93512	1.67605	0	5.15749	6.44858	2.19215	0	3.85228	6.9278	6.97734	4.71202	0.961566	1.67606	2.25577	7.24944	2.79809	1.33988	1.56961	0.900971	0.396514
H3K27p/K36p/K37p	35.3472	33.6391	27.3834	8.63868	13.7385	5.4985	49.0143	6.23895	11.1708	4.02836	40.1567	9.53704	8.67587	7.55852	6.46359	0.653167	0.976984	1.03109	2.17359	1.16589	0.49038	0.116947	0.168958	0.0827375
H3K27m1/K36p/K37p	28.9488	30.927	31.1027	8.75996	18.8997	6.25805	59.5979	7.98626	17.0137	4.87869	52.7784	12.2382	16.2804	13.1504	12.5004	1.29667	2.42969	2.84457	5.71903	2.34371	1.35659	0.18873	0.265008	0.144116
H3K27p/K36m1/K37p	76.5282	71.5158	62.2184	14.6546	23.0099	8.0385	101.242	8.689	17.1782	5.47091	37.4742	11.5135	33.7893	30.1972	21.909	2.23607	3.41029	3.86615	7.41667	2.42015	1.3381	0.163713	0.301346	0.122788
H3K27p/K37p/K37m1	0.0310953	0.0343437	0.0284259	0.0138792	0.0142568	0.0109614	0.0369767	0.0147486	0.0147691	0.0109714	0.0263773	0.0113961	0.0132433	0.0225961	0.021979	0.00653812	0.0137268	0.0148941	0.0130135	0.0206106	0.00305731	0.000391073	0.00169354	0.000384174
H3K27m2/K36p/K37p	#DIV/0!	15.0733	16.8594	8.77228	15.567	6.93421	#DIV/0!	21.1265	28.6216	10.8278	#DIV/0!	25.5819	10.5072	9.52576	11.2661	3.06521	6.25799	7.14121	18.3034	13.7989	6.53577	1.88664	1.61294	0.632753
H3K27p/K36m2/K37p	116.832	124.694	82.8421	27.4893	43.6218	17.4084	103.637	18.8495	33.167	12.8856	75.8295	20.9045	81.6029	71.5569	46.3394	9.39188	13.0032	14.3863	37.8909	10.4175	6.36381	1.2855	1.74587	0.449053
H3K27p/K36p/K37m2	#DIV/0!	0.00496955	0	0.0126877	0.00140209	0	#DIV/0!	0	0	0	#DIV/0!	0	0	0	0	0	0	0	0.0227167	0	0	0	0	0
H3K27ac/K36m3/K37p	0.1912	0.250509	0.13407	0.0593704	0.106925	0.032928	0.383937	0.106175	0.08023	0.0368491	0.22221	0.0790294	0.194445	0.185504	0.0639573	0.0320452	0.0568516	0.0521678	0.190995	0.093548	0.0261381	0.0298935	0.0211795	0.010289
H3K27m3/K36p/K37p	1.16534	1.23154	1.14453	0.774944	1.48499	0.664882	12.2432	2.71971	2.5616	1.5924	9.99549	2.88707	1.06668	0.962688	0.812974	0.497364	1.07405	1.08336	4.94083	3.57195	1.61499	0.974553	0.816745	0.268789
H3K27p/K36m3/K37p	14.2879	13.4455	5.77918	2.74337	4.61621	2.65934	39.7189	3.36062	5.38516	2.35252	21.9066	4.12799	8.60779	7.46944	4.08154	1.40051	2.13856	2.34534	11.3332	2.74639	1.69021	0.36657	0.659943	0.164709
H3K27p/K36p/K37m3	1.06391	1.43136	1.12855	0.51311	1.03749	0.495866	5.28909	0.927878	1.36016	0.576131	5.51687	1.11418	1.10795	1.11469	0.928859	0.366211	0.781192	0.838957	2.62167	2.1402	0.913929	0.437785	0.366339	0.112606
H3K27m2/K36m1/K37p	10.7165	10.1707	9.72816	5.31167	10.6286	4.22441	94.6434	17.7622	17.3659	10.4097	46.3746	18.0432	9.96258	8.93112	7.42397	3.10253	7.88039	9.27909	44.1711	22.4565	9.48929	4.17057	5.59523	1.49401
H3K27m1/K36m2/K37p	10.8895	11.0654	8.97115	4.04564	7.93426	2.96923	48.8573	7.8139	9.92173	4.86877	25.7566	7.95183	9.60747	9.27563	6.6284	2.41077	4.68498	6.28358	25.6238	9.255	4.20552	1.61467	2.39797	0.531727
H3K27m1/K36m1/K37p	7.80776	7.02893	5.40827	2.11461	4.22961	1.47144	29.7923	2.64329	4.36416	1.5698	7.82827	3.3606	5.26285	4.72278	3.54082	0.646648	1.36979	1.91516	4.96473	1.64357	0.921217	0.123981	0.262247	0.103938
H3K27m1/K36p/K37m1	0.00538316	0.00589429	0.0106989	0.00329288	0.00820856	0.00563782	0.0167164	0.0127282	0.0206711	0.0048071	0.0148741	0.00756528	0.00770185	0.0156937	0.00688506	0.00562539	0.0016503	0.00231646	0.00132426	0.00456546	0.00215016	0.00417137	0.00431638	0.00267692
H3K27ac/K36p/K37p	5.28457	6.58287	7.05282	0.0789821	3.54702	1.40619	10.6876	1.81132	4.08763	0.909521	12.3051	2.48908	1.74951	1.6692	2.01494	0.196261	0.314003	0.305076	0.640233	0.335811	0.175356	0.0329176	0.0287295	0.0182127
H3K27p/K36ac/K37p	0.0385332	0.0575504	0.0424334	0.0116648	0.0119009	0.008415	0.0401968	0.0140185	0.0109421	0.00707184	0.0461964	0.0126178	0.00958954	0.0125122	0.0122489	0.0021795	0.00395959	0.00280103	0.0121619	0.0086734	0.00286724	0.000777266	0.00215332	0.000340992
H3K27p/K36p/K37ac	0.0144351	0.0382297	0.0112119	0.00345973	0.000820148	0.000531115	0.00397512	0.00331595	0.000719532	0.000719916	0.00431817	0.00118709	0.000666878	0.000554189	0.000373824	0	0	2.15409e-05	0	0	0	0	0	0
H3K27m2/K36ac/K37p	0.0300051	0.0258063	0.0249962	0.00950484	0.0103392	0.00933509	0.0541074	0.023686	0.0113509	0.0113687	0.154113	0.0166661	0.0125284	0.0133338	0.0123485	0.00482595	0.00775507	0.00319015	0.0188542	0.0165431	0.00530493	0.00770734	0.00391874	0.000292939
H3K27ac/K36m2/K37p	2.79845	3.02956	2.45261	0.766073	1.15282	0.464221	3.83569	0.790783	1.35066	0.399545	4.19602	0.697713	1.76184	1.70257	1.39492	0.232826	0.30391	0.350156	0.738507	0.274738	0.18477	0.0829363	0.0443797	0.0203278
H3K27ac/K36ac/K37p	0	0.00108683	0.00274748	0	0	0	0.00178481	0	0	0	0	0	0.00181554	0	0	0	0	0	0.00424767	0	0	0	0	0
H33K27p/K36p/K37p	4.46769	4.87273	3.27199	1.01167	1.74857	0.783756	6.37887	0.702326	1.36938	0.46933	5.11705	1.21337	2.29519	2.26167	1.63171	0.28687	0.536103	0.585682	1.93378	0.885617	0.34037	0.108302	0.172869	0.0636724
H3un	119.716	116.3	98.5623	40.692	60.3064	29.907	284.588	45.9853	62.6094	37.3645	422.544	62.7477	71.4363	62.7066	58.4644	14.8572	24.6819	27.0768	99.5023	38.8563	21.8498	29.2442	16.169	3.56889
H3K56p	1064.55	1611.91	1442.51	432.5	774.671	365.503	11754.2	507.93	1088.03	354.456	8490.4	1014.69	653.287	866.001	768.029	186.775	279.643	282.961	1447.63	482.368	248.261	236.497	208.11	35.6563
H3K56m1/S57Ph	0.00935935	0.0326265	0.103697	0.000430476	0.00114548	0.000171072	0.00291274	0.000584534	0.000845173	6.28475e-05	0.00236462	0.000299761	0.0453006	0.00108846	4.94476e-05	0.000168902	0.000234671	9.58737e-05	0.0953442	0.0025001	0.000585293	7.0246e-05	0.000270037	0.000212181
H3K56m2	0.017039	0.00252425	0.022343	0.00168122	0.00549225	0.00180585	0.000440358	0.00384457	0.00636698	0.00366961	0.0203446	0.0120958	0.00465911	0.00119812	0.00787344	0.00130457	0.000475751	0.0017122	0.00477564	0.00203332	0.00228404	0.0105703	0.00115805	0.000686865
H3K56m3	0.000802369	0.0016159	0.00672668	0.00716628	0.00473699	0.00373522	0.00239302	0.0142118	0.00350272	0.00947529	0.00318728	0.0044142	0.00357681	0.00396089	0.00490457	0.0044721	0.00416983	0.00399938	0.00242364	0.00441962	0.00386748	0.00704966	0.0065712	0.00405351
H3K56ac	0.295812	0.573956	0.44314	0.157293	0.121102	0.109906	0.388653	0.212847	0.146943	0.149757	0.772372	0.267877	0.0725078	0.157903	0.228875	0.0804047	0.0961117	0.0332247	0.195763	0.245192	0.0656721	0.0503934	0.120335	0.0055859
H3K56ac/S57Ph	0.00210659	0.0152428	0.0123537	0.00459892	0.0147486	0.00468436	0.0104088	0.00885858	0.00807767	0.0107926	0.0218849	0.00785713	0.0205158	0.0287973	0.00767537	0.0036004	0.0151963	0.00805105	0.0453806	0.0190716	0.0059022	0.00132654	0.00359015	0.000752487
H3K64p	108.728	93.7988	80.2015	31.2029	51.6142	22.6317	255.107	32.2271	51.398	27.502	219.407	51.2506	63.1212	51.072	47.5446	9.79082	18.2595	23.945	79.5672	28.4103	17.1953	13.7538	11.5294	2.91243
H3K79p	617.333	707.122	659.932	252.719	361.748	155.679	2325.64	383.507	491.98	166.973	1002.52	403.366	374.899	554.366	288.983	120.788	169.552	90.4155	869.996	232.841	131.902	111.81	98.5981	17.9728
H3K79m1	9.68555	16.7852	12.7945	7.03445	12.324	5.3009	112.79	42.4683	29.6374	13.0567	37.4483	36.3696	7.17662	15.7343	6.4215	6.27444	8.64671	3.99872	76.4905	16.681	7.89002	9.27093	9.48618	1.30964
H3K79m2	0.612473	0.621675	0.552388	0.433924	0.66565	0.253027	11.1881	3.13984	1.60311	1.76202	6.66271	2.82873	0.671824	0.589074	0.515564	0.270352	0.461399	0.403673	4.79648	1.22436	0.790886	1.28435	0.768521	0.238278
H3K79m3	0.00180888	0.000383811	0.000178828	0.000583199	1.53766e-05	0.00131133	0.00660151	6.9171e-05	8.87272e-05	0.000797428	0.00161557	3.8732e-05	0.000244001	0.000419236	0.0133708	0.00228618	0.00206547	0.0012343	0.0014361	0.000854198	0.00206735	0.00454677	0.00286348	0.00421231
H3K122p	4186.62	4869.46	2049.14	832.629	1535.85	372.051	17990.8	510.969	1277.54	580.621	9982.73	1227.48	1812.21	1026.4	806.493	183.497	314.148	467.037	3291.82	320.88	271.963	196.609	214.093	37.7473
H4K20p	14.6356	10.2894	8.76911	4.82819	5.92006	2.3249	20.4377	5.12324	7.87205	3.21472	18.5953	5.76636	4.97669	5.11744	4.99939	1.41185	0.787072	1.2611	3.38707	2.38209	1.00265	0.575629	0.530311	0.422776
H4K20m1	15.1288	10.6708	8.81854	4.80779	4.85632	1.64352	19.6822	4.05152	5.78044	2.77491	8.64774	3.85083	3.8913	4.65018	3.72834	0.936211	0.468549	0.663724	2.02292	0.889158	0.417316	0.239365	0.32762	0.193568
H4K20m2	48.6915	38.1857	38.1792	18.678	28.2622	10.559	149.472	41.896	40.7503	26.3614	148.531	33.7734	26.7282	29.0142	32.4421	12.4318	7.15916	12.0133	39.012	21.0945	10.4855	12.4545	9.86062	5.77417
H4K20m3	0.214789	0.177618	0.148601	0.0973886	0.159048	0.0648126	1.14526	0.355489	0.201039	0.223726	1.06482	0.232444	0.176978	0.186776	0.165792	0.109079	0.0710061	0.132555	0.655739	0.270087	0.107894	0.233772	0.181155	0.108486
H4un	83.7388	43.0778	47.5119	33.2041	42.4418	18.2821	200.657	35.1871	64.3509	43.9947	201.488	60.3838	46.019	32.0396	67.8402	15.8242	8.14054	16.7465	42.4199	10.8828	17.2683	19.0265	12.317	7.9519
H4K79p/K91p	1044.93	501.229	637.077	609.325	613.061	298.788	4898.51	845.307	1229.75	628.551	922.018	1320.93	498.097	1612.83	712.825	500.255	234.257	170.776	1548.78	223.56	244.613	232.334	208.741	85.7806
